# Supplementary material for: The Relationship Between Microbiomes and Selective Regimes in the Sponge Genus Ircinia
Source: Front Microbiol. 2021 Mar 11;12:607289. doi: 10.3389/fmicb.2021.607289 (PMC7990798; doi:10.3389/fmicb.2021.607289)
Supplement: Supplementary file 4 [file Table_1.xlsx]

## Sheet: S1._SamplingMetadata
Table S1. Sampling metadata.
Sampling and collections							2bRAD					16S
USNM catalogue number	Specimen Name	Species	Sampling site	Sampling habitat	Approximate latitude and longitude	Habitat Characterization	number of reads pre-contamination removal	number of reads post-contamination removal	percent of reads removed by mapping to microbial symbiont MAGs	Included in Stacks assembly?	Final per-locus mean coverage	demultiplexed read count (post-trimmomatic)	final read count
1641993	jk18x3BZ	felix	Belize	Carrie Bow Cay forereef	16.8042, -88.0796	Coral Reef	348002	104161	0.700689	NO	N/A	18438	12982
1641994	jk18x4BZ	felix	Belize	Carrie Bow Cay forereef	16.8042, -88.0796	Coral Reef	112327	35489	0.684056	NO	N/A	4604	2811
1641991	JK18x1BZ	felix	Belize	Carrie Bow Cay forereef	16.8042, -88.0796	Coral Reef	900589	198225	0.779894	YES	5.63	20961	16327
1641992	JK18x2BZ	felix	Belize	Carrie Bow Cay forereef	16.8042, -88.0796	Coral Reef	504417	172931	0.657167	YES	5.56	8913	6752
1642022	JK18xA	felix	Belize	Carrie Bow Cay forereef	16.8042, -88.0796	Coral Reef	829965	182017	0.780693	YES	5.97	8647	6466
1642023	JK18xB	felix	Belize	Carrie Bow Cay forereef	16.8042, -88.0796	Coral Reef	1172763	335007	0.714344	YES	6.97	32161	26231
1642025	JK18xD	felix	Belize	Carrie Bow Cay forereef	16.8042, -88.0796	Coral Reef	1206293	301449	0.750103	YES	7.54	29214	25071
1642027	JK18xF	felix	Belize	Carrie Bow Cay forereef	16.8042, -88.0796	Coral Reef	1266115	391065	0.69113	YES	7.28	14874	10620
1642028	JK18xG	felix	Belize	Carrie Bow Cay forereef	16.8042, -88.0796	Coral Reef	1661871	453027	0.727399	YES	7.9	7692	5652
1642029	JK18xI	felix	Belize	Carrie Bow Cay forereef	16.8042, -88.0796	Coral Reef	1282849	329646	0.743036	YES	9.25	40909	31339
1642012	JK18x34	sp.1	Belize	Blue Ground	16.8083, -88.1496	Mangrove	254264	26184	0.89702	NO	N/A	29205	24469
1641995	JK18x17	sp.1	Belize	Twin Cays	16.8285, -88.1044	Mangrove	915152	136146	0.851231	YES	7.14	11504	8361
1641996	JK18x18	sp.1	Belize	Twin Cays	16.8285, -88.1044	Mangrove	1877693	541993	0.711352	YES	6.72	12375	10012
1641997	JK18x19	sp.1	Belize	Twin Cays	16.8285, -88.1044	Mangrove	2017389	384849	0.809234	YES	7.92	5387	3482
1641998	JK18x20	sp.1	Belize	Twin Cays	16.8285, -88.1044	Mangrove	942969	286093	0.696604	YES	8.81	3442	2219
1642005	JK18x27	sp.1	Belize	Blue Ground	16.8083, -88.1496	Mangrove	1420989	344594	0.757497	YES	6.9	24826	19334
1642006	JK18x28	sp.1	Belize	Blue Ground	16.8083, -88.1496	Mangrove	1453033	432444	0.702385	YES	7.3	19235	15332
1642007	JK18x29	sp.1	Belize	Blue Ground	16.8083, -88.1496	Mangrove	1635649	300459	0.816306	YES	7.35	41634	29390
1642008	JK18x30	sp.1	Belize	Blue Ground	16.8083, -88.1496	Mangrove	1866528	312695	0.832472	YES	8.1	27169	20634
1642009	JK18x31	sp.1	Belize	Blue Ground	16.8083, -88.1496	Mangrove	659543	148678	0.774574	YES	6.79	22255	17275
1642010	JK18x32	sp.1	Belize	Blue Ground	16.8083, -88.1496	Mangrove	1310492	266609	0.796558	YES	7.1	6724	5509
1642013	JK18x35	sp.1	Belize	Blue Ground	16.8083, -88.1496	Mangrove	582069	133008	0.771491	YES	6.35	10118	7583
1642014	JK18x36	sp.1	Belize	Blue Ground	16.8083, -88.1496	Mangrove	1230745	223972	0.818019	YES	7.98	23039	18888
1642001	JK18x23	sp.2	Belize	Blue Ground	16.8010, -88.1461	Coral Reef	499435	65992	0.867867	NO	N/A	26637	22010
1641999	JK18x21	sp.2	Belize	Blue Ground	16.8010, -88.1461	Coral Reef	1265489	307495	0.757015	YES	8.35	19699	15659
1642000	JK18x22	sp.2	Belize	Blue Ground	16.8010, -88.1461	Coral Reef	1742944	297806	0.829136	YES	6.59	22189	17067
1642002	JK18x24	sp.2	Belize	Blue Ground	16.8010, -88.1461	Coral Reef	990110	130137	0.868563	YES	6.45	10579	7404
1642003	JK18x25	sp.2	Belize	Blue Ground	16.8010, -88.1461	Coral Reef	1180375	131374	0.888701	YES	6.54	13883	10835
1642004	JK18x26	sp.2	Belize	Blue Ground	16.8010, -88.1461	Coral Reef	1302480	229989	0.823422	YES	6.78	24309	19539
1642018	jk18x40	strobilina	Belize	Blue Ground	16.7969, -88.1421	Coral Reef	545086	116396	0.786463	NO	N/A	14976	10459
1642020	jk18x42_43	strobilina	Belize	Blue Ground	16.7969, -88.1421	Coral Reef	170361	43084	0.747102	NO	N/A	20963	17232
1642021	jk18x44	strobilina	Belize	Blue Ground	16.7969, -88.1421	Coral Reef	285890	72690	0.745741	NO	N/A	34277	26079
1642024	jk18xC	strobilina	Belize	Carrie Bow Cay forereef	16.8042, -88.0796	Coral Reef	3155	882	0.720444	NO	N/A	18286	14634
1642016	JK18x38	strobilina	Belize	Blue Ground	16.7969, -88.1421	Coral Reef	762119	146467	0.807816	YES	5.81	21256	19062
1642019	JK18x41	strobilina	Belize	Blue Ground	16.7969, -88.1421	Coral Reef	857332	207616	0.757835	YES	6.12	12147	8238
1642026	JK18xE	strobilina	Belize	Carrie Bow Cay forereef	16.8042, -88.0796	Coral Reef	1274541	469755	0.631432	YES	7.09	2074	1563
1642030	JK18xJ	strobilina	Belize	Carrie Bow Cay forereef	16.8042, -88.0796	Coral Reef	1121315	423037	0.622731	YES	6.57	22870	18739
1641986	JK18x11	campana	Florida	Summerland Key	24.6609, -81.4563	Seagrass-dominant	1219495	240082	0.80313	YES	7.31	32799	26937
1641988	JK18x13	campana	Florida	Summerland Key	24.6609, -81.4563	Seagrass-dominant	1308601	326509	0.75049	YES	7.48	17778	13502
1641979	JK18x4FL	campana	Florida	Looe Key	24.5497, -81.4145	Coral Reef	1637511	470181	0.712868	YES	7.79	17083	14203
1641980	JK18x5	campana	Florida	Looe Key	24.5497, -81.4145	Coral Reef	677494	180650	0.733356	YES	6.07	23886	19763
1641983	JK18x8	campana	Florida	Summerland Key	24.6609, -81.4563	Seagrass-dominant	917798	234417	0.744588	YES	7.19	25032	20109
1641985	JK18x10	sp.ramose	Florida	Summerland Key	24.6609, -81.4563	Seagrass-dominant	1135474	303855	0.732398	YES	6.94	7272	5706
1641989	JK18x14	sp.ramose	Florida	Summerland Key	24.6609, -81.4563	Seagrass-dominant	1451712	330901	0.772062	YES	7.55	20729	14610
1641981	JK18x6	sp.ramose	Florida	Summerland Key	24.6609, -81.4563	Seagrass-dominant	1217835	266978	0.780777	YES	7.84	12994	9233
1641982	JK18x7	sp.ramose	Florida	Summerland Key	24.6609, -81.4563	Seagrass-dominant	1685563	448054	0.734181	YES	7.88	20466	15274
1641984	JK18x9	sp.ramose	Florida	Summerland Key	24.6609, -81.4563	Seagrass-dominant	1848350	419195	0.773206	YES	7.69	27798	23018
1582262	P16x36	campana	Panama	Punta Caracol	9.3771, -82.3023	Coral-dominated	1677814	607277	0.638055	YES	7.9	13366	10588
1582271	P16x45	campana	Panama	Punta Caracol	9.3771, -82.3023	Coral-dominated	1919250	835151	0.564856	YES	7.85	22458	18254
1582273	P16x47	campana	Panama	Punta Caracol	9.3771, -82.3023	Coral-dominated	1865017	768020	0.588197	YES	8.03	21716	18718
1582274	P16x48	campana	Panama	Punta Caracol	9.3771, -82.3023	Coral-dominated	1429540	635608	0.555376	YES	7.43	18185	14496
1582293	P16x67	campana	Panama	Stri Point	9.3517, -82.2590	Seagrass-dominant	1405102	505332	0.640359	YES	8.28	9037	6099
1582267	P16x41	Encrusting	Panama	Punta Caracol	9.3771, -82.3023	Coral-dominated	2303298	546887	0.762564	YES	8.18	12769	8314
1582268	P16x42	Encrusting	Panama	Punta Caracol	9.3771, -82.3023	Coral-dominated	1713621	607502	0.645486	YES	7.52	16298	12451
1582269	P16x43	Encrusting	Panama	Punta Caracol	9.3771, -82.3023	Coral-dominated	1224637	272249	0.77769	YES	6.73	24007	19562
1582270	P16x44	Encrusting	Panama	Punta Caracol	9.3771, -82.3023	Coral-dominated	1424346	286408	0.79892	YES	6.82	7937	5509
1582278	P16x52	Encrusting	Panama	Punta Caracol	9.3771, -82.3023	Coral-dominated	1863179	662732	0.6443	YES	7.69	22739	18070
1582283	P16x57	MassiveAgreen	Panama	Stri Point	9.3517, -82.2590	Seagrass-dominant	2123090	427443	0.798669	YES	8.47	11977	8877
1582285	P16x59	MassiveAgreen	Panama	Stri Point	9.3517, -82.2590	Seagrass-dominant	1067013	132224	0.87608	YES	7.63	13036	10682
1582286	P16x60	MassiveAgreen	Panama	Stri Point	9.3517, -82.2590	Seagrass-dominant	1004794	207487	0.793503	YES	6.5	10807	7382
1582288	P16x62	MassiveAgreen	Panama	Stri Point	9.3517, -82.2590	Seagrass-dominant	1090661	132725	0.878308	YES	7.73	6176	5346
1582259	P16x33	MassiveApink	Panama	Inner Solarte	9.3058, -82.1732	Mangrove	14392	2913	0.797596	NO	N/A	17680	14121
1582257	P16x31	MassiveApink	Panama	Inner Solarte	9.3058, -82.1732	Mangrove	835383	346873	0.584774	YES	6.75	26247	21765
1582258	P16x32	MassiveApink	Panama	Inner Solarte	9.3058, -82.1732	Mangrove	1561243	335234	0.785277	YES	7.01	22134	17138
1582260	P16x34	MassiveApink	Panama	Inner Solarte	9.3058, -82.1732	Mangrove	1148150	270677	0.764249	YES	7.03	12415	9179
1582282	P16x56	MassiveB	Panama	Stri Point	9.3517, -82.2590	Seagrass-dominant	2187822	440174	0.798807	YES	8.91	22945	16634
1582284	P16x58	MassiveB	Panama	Stri Point	9.3517, -82.2590	Seagrass-dominant	1966180	836648	0.57448	YES	9.35	33865	27322
1582287	P16x61	MassiveB	Panama	Stri Point	9.3517, -82.2590	Seagrass-dominant	870481	136528	0.843158	YES	11.65	41016	34803
1582289	P16x63	MassiveB	Panama	Stri Point	9.3517, -82.2590	Seagrass-dominant	1024964	244520	0.761436	YES	6.66	10992	7987
1582291	P16x65	MassiveB	Panama	Stri Point	9.3517, -82.2590	Seagrass-dominant	1319293	341165	0.741403	YES	6.9	4949	3384
1582292	p16x66	strobilina	Panama	Stri Point	9.3517, -82.2590	Seagrass-dominant	not attempted	not attempted	not attempted	N/A	N/A	21458	17186
1582261	P16x35	strobilina	Panama	Punta Caracol	9.3771, -82.3023	Coral-dominated	1857077	508932	0.72595	YES	7.32	21026	17259
1582266	P16x40	strobilina	Panama	Punta Caracol	9.3771, -82.3023	Coral-dominated	1746453	516429	0.704298	YES	7.09	7264	5199
1582272	P16x46	strobilina	Panama	Punta Caracol	9.3771, -82.3023	Coral-dominated	944329	294241	0.688413	YES	6.32	26298	19292
1582290	P16x64	strobilina	Panama	Stri Point	9.3517, -82.2590	Seagrass-dominant	2005927	686857	0.657586	YES	8.34	16579	12428
1582294	P16x68	strobilina	Panama	Stri Point	9.3517, -82.2590	Seagrass-dominant	2188403	768417	0.648869	YES	8.41	6181	4335
N/A	BelizeBlueGround1	water	Belize	Blue Ground	16.7969, -88.1421	Coral Reef						21632	18514
N/A	BelizeBlueGround2	water	Belize	Blue Ground	16.7969, -88.1421	Coral Reef						42307	34942
N/A	BelizeMangroveBlueGround	water	Belize	Blue Ground	16.7992, -88.1517	Mangrove						12172	9491
N/A	BelizeTwinCays2	water	Belize	Twin Cays	16.8285, -88.1044	Mangrove						29257	24933
N/A	PanamaISMangrove20	water	Panama	Inner Solarte	9.3058, -82.1732	Mangrove						16533	12359
N/A	PanamaISMangrove8	water	Panama	Inner Solarte	9.3058, -82.1732	Mangrove						30262	23787
N/A	PanamaISMangrove9	water	Panama	Inner Solarte	9.3058, -82.1732	Mangrove						27837	20302
N/A	PanamaPCR1	water	Panama	Punta Caracol	9.3771, -82.3023	Coral-dominated						14550	10228
N/A	PanamaPCR10	water	Panama	Punta Caracol	9.3771, -82.3023	Coral-dominated						14887	12040
N/A	PanamaPCR2	water	Panama	Punta Caracol	9.3771, -82.3023	Coral-dominated						19671	15153
N/A	PanamaPCR3	water	Panama	Punta Caracol	9.3771, -82.3023	Coral-dominated						18109	14202
N/A	PanamaPCR4	water	Panama	Punta Caracol	9.3771, -82.3023	Coral-dominated						18965	15272
N/A	PanamaPCR5	water	Panama	Punta Caracol	9.3771, -82.3023	Coral-dominated						30901	25309
N/A	PanamaPCR6	water	Panama	Punta Caracol	9.3771, -82.3023	Coral-dominated						29961	23863
N/A	PanamaPCR7	water	Panama	Punta Caracol	9.3771, -82.3023	Coral-dominated						39174	34159
N/A	PanamaPCR8	water	Panama	Punta Caracol	9.3771, -82.3023	Coral-dominated						25703	21993
N/A	PanamaPCR9	water	Panama	Punta Caracol	9.3771, -82.3023	Coral-dominated						22776	19574
N/A	PanamaSPR11	water	Panama	Stri Point	9.3517, -82.2590	Seagrass-dominant						24394	21213
N/A	PanamaSPR12	water	Panama	Stri Point	9.3517, -82.2590	Seagrass-dominant						21570	18032
N/A	PanamaSPR13	water	Panama	Stri Point	9.3517, -82.2590	Seagrass-dominant						11915	9671
N/A	PanamaSPR14	water	Panama	Stri Point	9.3517, -82.2590	Seagrass-dominant						22462	17655
N/A	PanamaSPR15	water	Panama	Stri Point	9.3517, -82.2590	Seagrass-dominant						20487	17328

## Sheet: S2._Vert_Trans_Ifelix_Schmitt
Table S2. List of OTUs that identified as being vertically transmitted in I. felix (Schmitt et al. 2007), downloaded from GenBank.
GenBank Accession	Sequence Name
DQ661845.1	Uncultured_bacterium_isolate_DGGE_gel_band_IF32_16S_ribosomal_RNA_gene_partial_sequence
DQ661783.1	Uncultured_bacterium_isolate_DGGE_gel_band_B183_16S_ribosomal_RNA_gene_partial_sequence
DQ661784.1	Uncultured_bacterium_isolate_DGGE_gel_band_B184_16S_ribosomal_RNA_gene_partial_sequence
DQ661753.1	Uncultured_bacterium_isolate_DGGE_gel_band_A83_16S_ribosomal_RNA_gene_partial_sequence
DQ661803.1	Uncultured_bacterium_isolate_DGGE_gel_band_F73_16S_ribosomal_RNA_gene_partial_sequence
DQ661752.1	Uncultured_bacterium_isolate_DGGE_gel_band_A72_16S_ribosomal_RNA_gene_partial_sequence
DQ661811.1	Uncultured_bacterium_isolate_DGGE_gel_band_F202_16S_ribosomal_RNA_gene_partial_sequence
DQ661806.1	Uncultured_bacterium_isolate_DGGE_gel_band_F93_16S_ribosomal_RNA_gene_partial_sequence
DQ661781.1	Uncultured_bacterium_isolate_DGGE_gel_band_B171_16S_ribosomal_RNA_gene_partial_sequence
DQ661757.1	Uncultured_bacterium_isolate_DGGE_gel_band_A132_16S_ribosomal_RNA_gene_partial_sequence
DQ661755.1	Uncultured_bacterium_isolate_DGGE_gel_band_A93_16S_ribosomal_RNA_gene_partial_sequence
DQ661769.1	Uncultured_bacterium_isolate_DGGE_gel_band_A212_16S_ribosomal_RNA_gene_partial_sequence
DQ661778.1	Uncultured_bacterium_isolate_DGGE_gel_band_B101_16S_ribosomal_RNA_gene_partial_sequence
DQ661747.1	Uncultured_bacterium_isolate_DGGE_gel_band_A21_16S_ribosomal_RNA_gene_partial_sequence
DQ661771.1	Uncultured_bacterium_isolate_DGGE_gel_band_A222_16S_ribosomal_RNA_gene_partial_sequence
DQ661748.1	Uncultured_bacterium_isolate_DGGE_gel_band_A31_16S_ribosomal_RNA_gene_partial_sequence
DQ661850.1	Uncultured_bacterium_isolate_DGGE_gel_band_IF91_16S_ribosomal_RNA_gene_partial_sequence
DQ661841.1	Uncultured_bacterium_isolate_DGGE_gel_band_G372_16S_ribosomal_RNA_gene_partial_sequence
DQ661756.1	Uncultured_bacterium_isolate_DGGE_gel_band_A104_16S_ribosomal_RNA_gene_partial_sequence
DQ661776.1	Uncultured_bacterium_isolate_DGGE_gel_band_B72_16S_ribosomal_RNA_gene_partial_sequence
DQ661794.1	Uncultured_bacterium_isolate_DGGE_gel_band_E183_16S_ribosomal_RNA_gene_partial_sequence
DQ661844.1	Uncultured_bacterium_isolate_DGGE_gel_band_IF15_16S_ribosomal_RNA_gene_partial_sequence
DQ661764.1	Uncultured_bacterium_isolate_DGGE_gel_band_A181_16S_ribosomal_RNA_gene_partial_sequence
DQ661809.1	Uncultured_bacterium_isolate_DGGE_gel_band_F141_16S_ribosomal_RNA_gene_partial_sequence
DQ661800.1	Uncultured_bacterium_isolate_DGGE_gel_band_E262_16S_ribosomal_RNA_gene_partial_sequence
DQ661847.1	Uncultured_bacterium_isolate_DGGE_gel_band_IF63_16S_ribosomal_RNA_gene_partial_sequence
DQ661789.1	Uncultured_bacterium_isolate_DGGE_gel_band_E43_16S_ribosomal_RNA_gene_partial_sequence
DQ661821.1	Uncultured_bacterium_isolate_DGGE_gel_band_F353_16S_ribosomal_RNA_gene_partial_sequence
DQ661801.1	Uncultured_bacterium_isolate_DGGE_gel_band_E282_16S_ribosomal_RNA_gene_partial_sequence
DQ661802.1	Uncultured_bacterium_isolate_DGGE_gel_band_F33_16S_ribosomal_RNA_gene_partial_sequence
DQ661840.1	Uncultured_bacterium_isolate_DGGE_gel_band_G353_16S_ribosomal_RNA_gene_partial_sequence
DQ661851.1	Uncultured_bacterium_isolate_DGGE_gel_band_IF111_16S_ribosomal_RNA_gene_partial_sequence
DQ661761.1	Uncultured bacterium isolate DGGE gel band A15-3 16S ribosomal RNA gene, partial sequence
DQ661775.1	Uncultured bacterium isolate DGGE gel band B6-1 16S ribosomal RNA gene, partial sequence
DQ661751.1	Uncultured bacterium isolate DGGE gel band A6-1 16S ribosomal RNA gene, partial sequence
DQ661804.1	Uncultured bacterium isolate DGGE gel band F8-3 16S ribosomal RNA gene, partial sequence
DQ661749.1	Uncultured bacterium isolate DGGE gel band A4-1 16S ribosomal RNA gene, partial sequence
DQ661846.1	Uncultured bacterium isolate DGGE gel band IF4-2 16S ribosomal RNA gene, partial sequence
DQ661814.1	Uncultured bacterium isolate DGGE gel band F23-2 16S ribosomal RNA gene, partial sequence
DQ661798.1	Uncultured bacterium isolate DGGE gel band E23-3 16S ribosomal RNA gene, partial sequence
DQ661797.1	Uncultured bacterium isolate DGGE gel band E22-1 16S ribosomal RNA gene, partial sequence
DQ661750.1	Uncultured bacterium isolate DGGE gel band A5-1 16S ribosomal RNA gene, partial sequence
DQ661829.1	Uncultured bacterium isolate DGGE gel band G10-2 16S ribosomal RNA gene, partial sequence
DQ661779.1	Uncultured bacterium isolate DGGE gel band B11-1 16S ribosomal RNA gene, partial sequence
DQ661799.1	Uncultured bacterium isolate DGGE gel band E24-1 16S ribosomal RNA gene, partial sequence
DQ661807.1	Uncultured bacterium isolate DGGE gel band F10-3 16S ribosomal RNA gene, partial sequence
DQ661827.1	Uncultured bacterium isolate DGGE gel band G8-3 16S ribosomal RNA gene, partial sequence
DQ661759.1	Uncultured bacterium isolate DGGE gel band A14-2 16S ribosomal RNA gene, partial sequence
DQ661805.1	Uncultured bacterium isolate DGGE gel band F9-1 16S ribosomal RNA gene, partial sequence
DQ661855.1	Uncultured bacterium isolate DGGE gel band IF15-1 16S ribosomal RNA gene, partial sequence
DQ661780.1	Uncultured bacterium isolate DGGE gel band B13-1 16S ribosomal RNA gene, partial sequence
DQ661815.1	Uncultured bacterium isolate DGGE gel band F24-2 16S ribosomal RNA gene, partial sequence
DQ661838.1	Uncultured bacterium isolate DGGE gel band G30-2 16S ribosomal RNA gene, partial sequence
DQ661773.1	Uncultured bacterium isolate DGGE gel band B1-1 16S ribosomal RNA gene, partial sequence
DQ661824.1	Uncultured bacterium isolate DGGE gel band F43-1 16S ribosomal RNA gene, partial sequence
DQ661818.1	Uncultured bacterium isolate DGGE gel band F27-2 16S ribosomal RNA gene, partial sequence
DQ661788.1	Uncultured bacterium isolate DGGE gel band E3-1 16S ribosomal RNA gene, partial sequence
DQ661825.1	Uncultured bacterium isolate DGGE gel band G1-1 16S ribosomal RNA gene, partial sequence
DQ661839.1	Uncultured bacterium isolate DGGE gel band G34-2 16S ribosomal RNA gene, partial sequence
DQ661837.1	Uncultured bacterium isolate DGGE gel band G29-1 16S ribosomal RNA gene, partial sequence
DQ661835.1	Uncultured bacterium isolate DGGE gel band G27-1 16S ribosomal RNA gene, partial sequence
DQ661857.1	Uncultured bacterium isolate DGGE gel band IF20-3 16S ribosomal RNA gene, partial sequence
DQ661817.1	Uncultured bacterium isolate DGGE gel band F26-2 16S ribosomal RNA gene, partial sequence
DQ661816.1	Uncultured bacterium isolate DGGE gel band F25-3 16S ribosomal RNA gene, partial sequence
DQ661746.1	Uncultured bacterium isolate DGGE gel band A1-4 16S ribosomal RNA gene, partial sequence
DQ661777.1	Uncultured bacterium isolate DGGE gel band B9-1 16S ribosomal RNA gene, partial sequence

## Sheet: S3._SuppKrakenDatbases
Table S3. Supplementray genomes added to Kraken database.
NCBI Accession Number	Species	Higher Taxon
GCA_009193005.1	Lamellibrachia luymesi	Annelida
GCA_001703475.1	Hydroides elegans	Annelida
GCA_000326865.1	Helobdella robusta	Annelida
GCA_003999395.1	Eisenia fetida	Annelida
GCA_000328365.1	Capitella teleta	Annelida
GCA_003709985.1	Semibalanus balanoides	Arthropoda (Crustacea)
GCA_003789085.1	Penaeus vannamei	Arthropoda (Crustacea)
GCA_005815305.1	Pandalus platyceros	Arthropoda (Crustacea)
GCA_003990815.1	Daphnia magna	Arthropoda (Crustacea)
GCA_009805615.1	Amphibalanus amphitrite	Arthropoda (Crustacea)
GCA_002740985.1	Calanus glacialis	Arthropoda (Crustacea)
GCA_001005385.1	Caligus rogercresseyi	Arthropoda (Crustacea)
GCA_001587735.2	Parhyale hawaiensis	Arthropoda (Crustacea)
GCA_006783055.1	Trinorchestia longiramus	Arthropoda (Crustacea)
GCA_003723985.1	Lepidurus apus lubbocki	Arthropoda (Crustacea)
GCA_009176605.1	Armadillidium nasatum	Arthropoda (Crustacea)
GCA_900659605.1	Tisbe holothuriae	Arthropoda (Crustacea)
GCA_900607525.1	Apocyclops roy	Arthropoda (Crustacea)
GCA_003724045.1	Lepidurus arcticus	Arthropoda (Crustacea)
GCA_900241095.1	Acartia tonsa	Arthropoda (Crustacea)
GCA_004011675.1	Palaemon carinicauda	Arthropoda (Crustacea)
GCA_002872375.1	Eulimnadia texana	Arthropoda (Crustacea)
GCA_008373055.1	Portunus trituberculatus	Arthropoda (Crustacea)
GCA_001039355.2	Lingula anatina	Brachiopoda
GCA_004765925.1	Euprymna scolopes	Cephalopoda (Mollusca)
GCA_000001635.8	Mus musculus	Chordata
GCA_000695325.1	Pleurobrachia bachei	Ctenophora
GCA_000724045.1	Globodera pallida	Nematoda
GCA_000150275.1	Trichoplax adhaerens	Placozoa
GCA_000699445.1	Schistosoma haematobium	Platyhelminthes

## Sheet: S4._BLASThitsToVertXmitted
Table S4. blastn results querying OTUs from the current study to OTUs that are putatively vertically transmitted in I. felix (Schmitt et al. 2007).
GenBank Accession no. of 16S rRNA Sequence from Vertically Transmitted Symbiont (Schmitt et al. 2007)	OTU from the Current Dataset	Length of Pairwise Alignment	Identity	E-Value	Bit Score	Mean relative abundance in water	Mean relative abundance in Ircinia
DQ661803.1	Otu00012	253	100	9.13e-135	468	2.46e-05	0.0177163
DQ661753.1	Otu00012	253	100	9.13e-135	468	2.46e-05	0.0177163
DQ661784.1	Otu00012	253	100	9.13e-135	468	2.46e-05	0.0177163
DQ661825.1	Otu00015	253	100	9.13e-135	468	4.31e-05	0.0132265
DQ661847.1	Otu00021	253	100	9.13e-135	468	2.76e-05	0.0105023
DQ661841.1	Otu00030	253	100	9.13e-135	468	2.7e-05	0.00855545
DQ661835.1	Otu00038	253	100	9.13e-135	468	1.29e-05	0.00933499
DQ661824.1	Otu00039	254	100	2.55e-135	470	2.57e-05	0.00943935
DQ661773.1	Otu00039	254	100	2.55e-135	470	2.57e-05	0.00943935
DQ661780.1	Otu00163	253	100	9.13e-135	468	7.91e-06	0.00129335
DQ661799.1	Otu00210	253	100	9.13e-135	468	8.41e-06	0.000674687
DQ661749.1	Otu00210	253	100	9.13e-135	468	8.41e-06	0.000674687

## Sheet: S5_PairwisePermanova
Table S5. Results of pairwise PERMANOVAs between host lineages. P-values were corrected using the Benjamini-Hochberg FDR approach.
Comparison	First Host in Comparison	Second Host in Comparison	F Model	R2	p value	p BH-adjusted	sig (p < 0.05)
1	Massive A Pink	Ramose	7.4631	0.51601	0.0079	0.00941311	YES
2	Massive A Pink	I. campana Florida	15.5647	0.689781	0.0064	0.00926809	YES
3	Massive A Pink	Sp.1	3.86427	0.204846	0.0006	0.001925	YES
4	Massive A Pink	I. felix	4.17617	0.258168	0.0008	0.00203077	YES
5	Massive A Pink	Sp.2	9.0258	0.530125	0.0056	0.0084	YES
6	Massive A Pink	I. strobilina Belize	4.08665	0.290108	0.0019	0.00368824	YES
7	Massive A Pink	I. strobilina Panama	4.28489	0.348793	0.005	0.00767442	YES
8	Massive A Pink	I. campana Panama	3.62108	0.340933	0.0073	0.00941311	YES
9	Massive A Pink	Encrusting	4.92435	0.412966	0.0097	0.0101619	YES
10	Massive A Pink	Massive B	2.58691	0.269838	0.0083	0.00941311	YES
11	Massive A Pink	Massive A Green	3.52474	0.370061	0.0278	0.0286687	YES
12	Ramose	I. campana Florida	7.79723	0.493582	0.0077	0.00941311	YES
13	Ramose	Sp.1	7.44632	0.31759	0.0002	0.0011	YES
14	Ramose	I. felix	5.79878	0.308466	0.0008	0.00203077	YES
15	Ramose	Sp.2	4.54715	0.335654	0.0016	0.00364138	YES
16	Ramose	I. strobilina Belize	8.78728	0.444087	0.0007	0.001925	YES
17	Ramose	I. strobilina Panama	11.5544	0.562137	0.0019	0.00368824	YES
18	Ramose	I. campana Panama	7.2074	0.47394	0.0087	0.00941311	YES
19	Ramose	Encrusting	4.49256	0.359619	0.0082	0.00941311	YES
20	Ramose	Massive B	3.69331	0.315848	0.0075	0.00941311	YES
21	Ramose	Massive A Green	6.55886	0.483733	0.0085	0.00941311	YES
22	I. campana Florida	Sp.1	18.036	0.529909	0.0002	0.0011	YES
23	I. campana Florida	I. felix	7.85552	0.376664	0.0006	0.001925	YES
24	I. campana Florida	Sp.2	4.62272	0.339339	0.0039	0.00627805	YES
25	I. campana Florida	I. strobilina Belize	15.5958	0.5864	0.0007	0.001925	YES
26	I. campana Florida	I. strobilina Panama	19.2122	0.680989	0.0025	0.0043421	YES
27	I. campana Florida	I. campana Panama	12.6454	0.612505	0.0087	0.00941311	YES
28	I. campana Florida	Encrusting	7.94638	0.498319	0.0065	0.00926809	YES
29	I. campana Florida	Massive B	6.42227	0.445302	0.0071	0.00941311	YES
30	I. campana Florida	Massive A Green	9.58117	0.577834	0.0086	0.00941311	YES
31	Sp.1	I. felix	9.01958	0.300457	0.0001	0.0011	YES
32	Sp.1	Sp.2	11.2629	0.398506	0.0001	0.0011	YES
33	Sp.1	I. strobilina Belize	10.4934	0.355789	0.0002	0.0011	YES
34	Sp.1	I. strobilina Panama	12.0757	0.415319	0.0001	0.0011	YES
35	Sp.1	I. campana Panama	7.19577	0.310219	0.0002	0.0011	YES
36	Sp.1	Encrusting	6.4413	0.287029	0.0002	0.0011	YES
37	Sp.1	Massive B	4.62428	0.224215	0.0002	0.0011	YES
38	Sp.1	Massive A Green	5.7248	0.276229	0.0006	0.001925	YES
39	I. felix	Sp.2	5.5514	0.283939	0.0003	0.00132	YES
40	I. felix	I. strobilina Belize	6.8526	0.299861	0.0001	0.0011	YES
41	I. felix	I. strobilina Panama	7.08639	0.336064	0.0003	0.00132	YES
42	I. felix	I. campana Panama	3.35326	0.205051	0.0003	0.00132	YES
43	I. felix	Encrusting	3.69828	0.221477	0.0007	0.001925	YES
44	I. felix	Massive B	2.52614	0.162702	0.0002	0.0011	YES
45	I. felix	Massive A Green	3.613	0.23141	0.001	0.00235714	YES
46	Sp.2	I. strobilina Belize	12.0023	0.500049	0.0006	0.001925	YES
47	Sp.2	I. strobilina Panama	13.6528	0.577217	0.0019	0.00368824	YES
48	Sp.2	I. campana Panama	7.09694	0.440888	0.0018	0.00368824	YES
49	Sp.2	Encrusting	3.46529	0.277995	0.0066	0.00926809	YES
50	Sp.2	Massive B	3.85714	0.3	0.0022	0.00403333	YES
51	Sp.2	Massive A Green	6.109	0.432986	0.005	0.00767442	YES
52	I. strobilina Belize	I. strobilina Panama	3.36399	0.218953	0.0002	0.0011	YES
53	I. strobilina Belize	I. campana Panama	5.77984	0.344452	0.0006	0.001925	YES
54	I. strobilina Belize	Encrusting	7.27595	0.398116	0.001	0.00235714	YES
55	I. strobilina Belize	Massive B	4.78109	0.302963	0.0007	0.001925	YES
56	I. strobilina Belize	Massive A Green	5.97576	0.374052	0.0024	0.00428108	YES
57	I. strobilina Panama	I. campana Panama	5.3181	0.371425	0.0018	0.00368824	YES
58	I. strobilina Panama	Encrusting	8.10101	0.473715	0.0021	0.00396	YES
59	I. strobilina Panama	Massive B	4.37079	0.326891	0.0031	0.00524615	YES
60	I. strobilina Panama	Massive A Green	5.77853	0.419386	0.0039	0.00627805	YES
61	I. campana Panama	Encrusting	4.00748	0.333749	0.0082	0.00941311	YES
62	I. campana Panama	Massive B	2.49531	0.237755	0.0074	0.00941311	YES
63	I. campana Panama	Massive A Green	4.56618	0.394787	0.0095	0.0101129	YES
64	Encrusting	Massive B	1.65415	0.171341	0.0396	0.0402092	YES
65	Encrusting	Massive A Green	2.56716	0.268331	0.0081	0.00941311	YES
66	Massive B	Massive A Green	1.22113	0.148535	0.3161	0.3161	NO

## Sheet: S6_FSTOutliersAnnotated
Table S6. Table listing FST-outliers mapped to annotated transcripts. Transcripts with identical annotations are collapsed into one row. Genes involved in immunity are under balancing selection and genes involved in cellular mechanics are under positive selection in Ircinia.
BayeScan	fsthet	2bRAD Locus Outlier	Trinity 'gene'	Transcripts on gene	Domain features via HMMER	Gene annotation via NCBI
positive sel		CLocus_76203	TRINITY_DN2919_c0_g1	Transcript_19655	CH-like domain in sperm protein, CAMSAP CH domain, Filamin/ABP280 repeat, Cyclin N-terminal domain	FLNC
positive sel		CLocus_76713	TRINITY_DN1384_c0_g1	Transcript_9901, Transcript_9903	Filamin/ABP280 repeat, YtkA-like	FLNB
	positive sel	CLocus_13672	TRINITY_DN11504_c0_g1	Transcript_61643, Transcript_61644	DEAD/DEAH box helicase, Helicase conserved C-terminal domain	BLM
	balancing sel	CLocus_31257	TRINITY_DN12087_c0_g1	Transcript_63383, Transcript_63384, Transcript_63390	no sig. HMMER hits	S8 Family Serine Peptidase
	balancing sel	CLocus_57351	TRINITY_DN11166_c0_g3	Transcript_60243	no sig. HMMER hits	MAP3K
	balancing sel	CLocus_376757	TRINITY_DN3714_c0_g1	Transcript_24274, Transcript_24276, Transcript_24277,	Ras association (RalGDS/AF-6) domain, Novel Ras effector 1 C-terminal SARAH (Sav/Rassf/Hpo) domain, Ankyrin repeats (Ank, Ank_2, Ank_3, Ank_4, Ank_5)	Rassf1
				Transcript_24278, Transcript_24279
	balancing sel	CLocus_219329	TRINITY_DN23900_c0_g2	Transcript_93043	Phage integrase family	TES
	balancing sel	CLocus_34684	TRINITY_DN68288_c0_g1	Transcript_136651, Transcript_136653, Transcript_136654, Transcript_136655, Transcript_136656	Phage integrase family, Reverse transcriptase (RNA-dependent DNA polymerase)	PRSS21
	balancing sel	CLocus_685090	TRINITY_DN1258_c2_g1	Transcript_9588, Transcript_9591, Transcript_9594	PHD-finger	Kdm5b
positive sel	positive sel	CLocus_13857	TRINITY_DN17238_c0_g1	Transcript_78835	Integrase core domain, Reverse transcriptase (RNA-dependent DNA polymerase), Zinc knuckle	TY3B-G
	balancing sel	CLocus_228457	TRINITY_DN13274_c0_g1	Transcript_67503, Transcript_67504	Reverse transcriptase-like	POL
	balancing sel	CLocus_214786	TRINITY_DN23991_c0_g1	Transcript_93163	Integrase core domain	POL
	balancing sel	CLocus_461127	TRINITY_DN20193_c1_g1	Transcript_85677	Reverse transcriptase (RNA-dependent DNA polymerase)	POL
	balancing sel	CLocus_234266	TRINITY_DN185_c0_g1	Transcript_1675, Transcript_1681	Reverse transcriptase (RNA-dependent DNA polymerase), Integrase core domain	gag-pol
	balancing sel	CLocus_223903	TRINITY_DN2279_c0_g2	Transcript_15199	Reverse transcriptase (RNA-dependent DNA polymerase)	GIY-YIG
	balancing sel	CLocus_23794	TRINITY_DN12242_c0_g1	Transcript_63993, Transcript_63996	Reverse transcriptase (RNA-dependent DNA polymerase), Integrase core domain	pro-pol-dUTPase
	balancing sel	CLocus_376757	TRINITY_DN147102_c0_g1	Transcript_187547	PUB domain	PUB domain-containing protein
	balancing sel	CLocus_32978	TRINITY_DN7718_c0_g1	Transcript_45973	BED zinc finger	ZBED4
